# Supplementary material for: Estimation of Dry Season Irrigation Water Abstraction in Lunsemfwa, Mulungushi, Mwomboshi, and Mkushi Subbasins from 2013 to 2017 in Zambia
Source: Hindawi journal article supplement (doi:10.1155/2019/8979837), 2019-07-14
Supplement: f1 [file 8979837.f1.xlsx]

## Sheet: serenge ETo
serenje (zambia) - monthly data: January 2013 - December 2017
3 : Monthly records (1=daily, 2=10-daily and 3=monthly data)
1 : First day of record (1, 11 or 21 for 10-day or 1 for months)
1 : First month of record
2013 : First year of record (1901 if not linked to a specific year)
	Aerage ETo mm/day
	2013	2014	2015	2016	2017	average
jan	5.1	4.9	5	5.7	5	5.14
feb	5.2	4.5	5.5	6.2	5	5.28
mar	6.7	5.7	6.5	5.8	5.2	5.98
apr	5.7	5.8	5.3	6.3	5.4	5.7
may	6.6	6.8	6.8	6.9	5.8	6.58
jun	6.9	7	7	6.4	6.3	6.72
jul	7.1	7.1	7.4	6.8	6.5	6.98
aug	8.5	8.4	8.4	8	7.9	8.24
sep	9.9	10	9.4	9.8	9.5	9.72
oct	9.7	10.3	10.3	10.5	9.3	10.02
nov	7.7	9.4	8.1	7.9	6.5	7.92
dec	5.8	5.6	6.6	5.6	6.2	5.96
average	7.075	7.125	7.19167	7.15833	6.55
						average
					2013	7.075
					2014	7.125
					2015	7.19167
					2016	7.15833
					2017	6.55

## Sheet: lusaka airport ETo
lusaka Airport2013 (zambia) - monthly data: January 2013 - December 2017
3 : Monthly records (1=daily, 2=10-daily and 3=monthly data)
1 : First day of record (1, 11 or 21 for 10-day or 1 for months)
1 : First month of record
2013 : First year of record (1901 if not linked to a specific year)
		Aerage ETo mm/day
		2013	2014	2015	2016	2017	average
	jan	5.6	5.6	5.4	7	4.6	5.64
	feb	5.8	5.2	6.2	6.5	5.2	5.78
	mar	6.2	6.8	6.9	5.6	5.3	6.16
	apr	5.5	6.2	4.7	5.8	5.1	5.46
	may	6.1	6.6	6.3	6	5.6	6.12
	jun	5.7	6.4	6	5.6	4.9	5.72
	jul	5.7	6.8	6.4	6	3.9	5.76
	aug	7.7	8.4	7.7	7.6	7.2	7.72
	sep	9.3	9.8	9.1	9	9	9.24
	oct	9.4	10.6	9.7	10.3	8.5	9.7
	nov	8.2	10	8.1	7.9	6.6	8.16				average
	dec	6.7	6.6	7.4	6.4	6.3	6.68			jan	5.64
	average	6.825	7.41667	6.99167	6.975	6.01667				feb	5.78
										mar	6.16
							average ETo			apr	5.46
						2013	6.825			may	6.12
						2014	7.41667			jun	5.72
						2015	6.99167			jul	5.76
						2016	6.975			aug	7.72
						2017	6.01667			sep	9.24
										oct	9.7
										nov	8.16
										dec	6.68

## Sheet: kabwe ETo
kabwe mulungush (zambia) - monthly data: January 2013 - December 2017
3 : Monthly records (1=daily, 2=10-daily and 3=monthly data)
1 : First day of record (1, 11 or 21 for 10-day or 1 for months)
1 : First month of record
2013 - 2017 : First year of record (2013 if not linked to a specific year)
		Aerage ETo mm/day
		2013	2014	2015	2016	2017	Average ETo
	jan	5.6	5.9	5.5	6.1	4.8	5.58
	feb	5.8	5.1	6.3	6.6	5.2	5.8
	mar	6.4	6.3	7	5.8	6.8	6.46
	apr	6.1	6.1	4.8	6	8.1	6.22
	may	6.3	6.4	6.4	6.5	6.2	6.36
	jun	5.6	6.2	6.5	6	5.3	5.92
	jul	4.5	6.2	4.5	6.1	4.1	5.08
	aug	5.9	7.6	7.6	7.7	7.6	7.28
	sep	8.2	9.2	9.3	9.4	9.2	9.06
	oct	9.4	9.9	10	10.3	9	9.72
	nov	8	8.9	8.4	7.6	7.1	8
	dec	6.4	7.5	7	6.2	6.1	6.64
	Average	6.51667	7.10833	6.94167	7.025	6.625					Average ETo
	sum	78.2								jan	5.58
							Average ETo			feb	5.8
						2013	6.51667			mar	6.46
						2014	7.10833			apr	6.22
						2015	6.94167			may	6.36
						2016	7.025			jun	5.92
						2017	6.625			jul	5.08
										aug	7.28
										sep	9.06
										oct	9.72
										nov	8
										dec	6.64

## Sheet: 5 yrs rain fail weather station
	5yrs Monthy Average rain fall
	Mwomboshi	Kabwe Mulungushi	Serenje Mkushi
January	269.275	346.475	184.125
february	148.7	207.85	227.725
March	109.65	225.85	304.15
April	84.8	50.7	47.55
May	0.15	0	0.1
June	0	0	9.15
July	0	0	1.5
August	0.2	0.3	0.8
September	1.95	0.15	3.2
October	14.4	16.489	6.64
November	75.84	114.066	39.48
December	207.24	231.312	122.36
					average rainfall
					Mwomboshi	Kabwe Mulungushi	Serenje Mkushi
				2013	793.5	868.633	1524.8
				2014	931.1	1076.9	1283.4
				2015	875.2	933.4	1223.2
				2016	743	1343.6	798.6
				2017	1070.4	1605.2	333.4
					882.64	1165.55	1032.68

## Sheet: estimated areas from QGIS
									years
	2017	2016	2015	2014	2013				2013	2014	2015	2016	2017
month1 may	31		21	24	23			Mkushi	22	21.3333	18.6667	12.5	29.3333
month2 july	30	15	21	2	21			Lunsemfwa	167	114.333	131	150	129.667
month3 sept	27	10	14	38				Mulungushi	25.5	23.3333	32	24.5	30.6667
average	29.3333	12.5	18.6667	21.3333	22			Mwobomshi	23.5	22	25	23	21.6667
month1 may	128			61	140								2013	2014	2015	2016	2017
month2 july	117	211	122	144	194								22	21.3333	18.6667	12.5	29.3333
month3 sept	144	89	140	138									167	114.333	131	150	129.667
average	129.667	150	131	114.333	167								25.5	23.3333	32	24.5	30.6667
month1 may	21			13	26								23.5	22	25	23	21.6667
month2 july	34	17	30	25	25
month3 sept	37	32	34	32
average	30.6667	24.5	32	23.3333	25.5
month1 may	18		17	15	25
month2 july	19	14	38	28	22
month3 sept	28	32	20	23
average	21.6667	23	25	22	23.5

## Sheet: irrigation estimates from AquaC
		Wheat Gross Volume Calculations
			2013			2014			2015			2016			2017
		catchments	irr mm/ha	area [ha]	VOL [m3]	irr mm/ha	area [ha]	VOL [m3]	irr mm/ha	area [ha]	VOL [m3]	irr mm/ha	area [ha]	VOL	irr mm/ha	area [ha]	VOL [m3]
		mkushi	678	2200	1.4916e+07	639.6	2133.33	13644800	710	1866.67	1.32533e+07	577.3	1250	7.21625e+06	592.6	2933.33	1.73829e+07
		lunsemfwa	473.3	16700	79041100	566.9	11433.3	6.48156e+07	403.3	13100	52832300	558.5	15000	83775000	462.2	12966.7	5.99319e+07
		mulungushi	473.3	2550	12069150	566.9	2333.33	1.32277e+07	403.5	3200	12912000	556.5	2450	13634250	462.2	3066.67	1.41741e+07
		mwamboshi	603.3	2350	1.41775e+07	639.7	2200	1.40734e+07	646	2500	16150000	610	2300	14030000	447.3	2166.67	9.6915e+06
		aver
		years averge area in km squared									mkushi
		2017	2016		2015	2014		2013			lunsemfwa
	Mkushi	29.3333	12.5		18.6667	21.3333		22			mulungushi
	lunsemfwa	129.667	150		131	114.333		167			mwamboshi
	mulungushi	30.6667	24.5		32	23.3333		25.5
	mwabomshi	21.6667	23		25	22		23.5
											wheat
												VOL [m3]
		years averge area in ha										2013	2014	2015	2016	2017
		2017	2016		2015	2014		2013			mkushi	1.4916e+07	13644800	1.32533e+07	7.21625e+06	1.73829e+07
	Mkushi	2933.33	1250		1866.67	2133.33		2200			lunsemfwa	79041100	6.48156e+07	52832300	83775000	5.99319e+07
	lunsemfwa	12966.7	15000		13100	11433.3		16700			mulungushi	12069150	1.32277e+07	12912000	13634250	1.41741e+07
	mulungushi	3066.67	2450		3200	2333.33		2550			mwamboshi	1.41775e+07	1.40734e+07	16150000	14030000	9.6915e+06
	mwabomshi	2166.67	2300		2500	2200		2350
													6
			Soybean Gross Volume Calculations
			2013			2014			2015			2016			2017
		Catchments	irr mm/ha	area [ha]	VOL [m3]	irr mm/ha	area [ha]	VOL [m3]	irr mm/ha	area [ha]	VOL [m3]	irr mm/ha	area [ha]	VOL	irr mm/ha	area [ha]	VOL [m3]
		mkushi	481.2	2200	10586400	453	2133.33	9664000	504.8	1866.67	9.42293e+06	406.3	1250	5078750	408.6	2933.33	11985600
		lunsemfwa	407.9	16700	68119300	423	11433.3	48363000	438.8	13100	57482800	409.8	15000	61470000	341.4	12966.7	4.42682e+07
		mulungushi	407.6	2550	10393800	423	2333.33	9870000	438.8	3200	14041600	409.8	2450	10040100	341.4	3066.67	10469600
		mwamboshi	314.4	2350	7.3884e+06	395.4	2200	8698800	458.4	2500	11460000	294.7	2300	6.7781e+06	306.6	2166.67	6.643e+06
			VOL [m3]
			2013	2014	2015	2016	2017
		mkushi	10586400	9664000	9.42293e+06	5078750	11985600
		lunsemfwa	68119300	48363000	57482800	61470000	4.42682e+07
		mulungushi	10393800	9870000	14041600	10040100	10469600
		mwamboshi	7.3884e+06	8698800	11460000	6.7781e+06	6.643e+06

## Sheet: gross irragation calculation
		Net irrigation [mm]						Gross irrigation [mm]
		2013	2014	2015	2016	2017		2013	2014	2015	2016	2017
mkushi	Soybean (Glycine max)	481.2	453	504.8	406.3	408.6		641.6	604	673.067	541.733	544.8
	Wheat (Triticum aestivum)	678	639.6	710	577.3	592.6		904	852.8	946.667	769.733	790.133
Lunsemfwa	Soybean (Glycine max)	407.9	423	438.8	409.8	341.4		543.867	564	585.067	546.4	455.2
	Wheat (Triticum aestivum)	473.3	566.9	403.3	558.5	462.2		631.067	755.867	537.733	744.667	616.267
Mulungushi	Soybean (Glycine max)	407.6	423	438.8	409.8	341.4		543.467	564	585.067	546.4	455.2
	Wheat (Triticum aestivum)	473.3	566.9	403.3	558.5	462.2		631.067	755.867	537.733	744.667	616.267
Mwamboshi	Soybean (Glycine max)	314.4	395.4	458.4	294.7	306.6		419.2	527.2	611.2	392.933	408.8
	Wheat (Triticum aestivum)	603.3	639.7	646	610	447.3		804.4	852.933	861.333	813.333	596.4

## Sheet: ETo and Net irrigaion
										Net irrigation [mm]
	Catchment	Crop	2013	2014	2015	2016	2017			2013	2014	2015	2016	2017
			Net irrigation [mm]						mkushi	678	639.6	710	577.3	592.6	3197.5
	mkushi	Soybean (Glycine max)	481.2	453	504.8	406.3	408.6		lunsemfwa	473.3	566.9	403.3	558.5	462.2	2464.2
		Wheat (Triticum aestivum)	678	639.6	710	577.3	592.6		mulungushi	473.3	566.9	403.5	556.5	462.2	2462.4
	Lunsemfwa	Soybean (Glycine max)	407.9	423	438.8	409.8	341.4		mwamboshi	603.3	639.7	646	610	447.3	2946.3
		Wheat (Triticum aestivum)	473.3	566.9	403.3	558.5	462.2			2013	2014	2015	2016	2017
	Mulungushi	Soybean (Glycine max)	407.6	423	438.8	409.8	341.4		mkushi	481.2	453	504.8	406.3	408.6	2253.9
		Wheat (Triticum aestivum)	473.3	566.9	403.3	558.5	462.2		lunsemfwa	407.9	423	438.8	409.8	341.4	2020.9
	Mwamboshi	Soybean (Glycine max)	314.4	395.4	458.4	294.7	306.6		mulungushi	407.6	423	438.8	409.8	341.4	2020.6
		Wheat (Triticum aestivum)	603.3	639.7	646	610	447.3		mwamboshi	314.4	395.4	458.4	294.7	306.6	1769.5
			Net irrigation [mm]
			2013	2014	2015	2016	2017			water
	mkushi	Soybean (Glycine max)	481.2	453	504.8	406.3	408.6		mkushi	3197.5	2253.9
		Wheat (Triticum aestivum)	678	639.6	710	577.3	592.6		lunsemfwa	2464.2	2020.9
	Lunsemfwa	Soybean (Glycine max)	407.9	423	438.8	409.8	341.4		mulungushi	2462.4	2020.6
		Wheat (Triticum aestivum)	473.3	566.9	403.3	558.5	462.2		mwamboshi	2946.3	1769.5
	Mulungushi	Soybean (Glycine max)	407.6	423	438.8	409.8	341.4
		Wheat (Triticum aestivum)	473.3	566.9	403.3	558.5	462.2
	Mwamboshi	Soybean (Glycine max)	314.4	395.4	458.4	294.7	306.6
		Wheat (Triticum aestivum)	603.3	639.7	646	610	447.3
			2013	2014	2015	2016	2017
	Lunsemfwa	Soybean (Glycine max)	407.9	423	338.8	409.8	341.4
		Soybean ETo	428	438.3	363	428.9	309.9
		Wheat (Triticum aestivum)	473.3	566.9	403.3	558.5	462.2
		wheat ETo	492.3	539.6	428	576.4	479.9
		rain	4.5	0	10.3	3.6	0
			2013	2014	2015	2016	2017
	Mkushi	Soybean (Glycine max)	481.2	453	504.8	406.3	408.6
		Soybean ETo	507	468.2	524.1	455.7	410.2
		Wheat (Triticum aestivum)	678	639.6	710	577.3	592.6
		wheat ETo	708.6	356.6	732.2	664.2	615.8
		rain	12.7	0	5.2	37	9.1
			2013	2014	2015	2016	2017
	Mwamboshi	Soybean (Glycine max)	426	442.8	458.4	428	306.6
		Soybean ETo	453	464.8	489.8	454.4	331.1
		Wheat (Triticum aestivum)	603.3	639.7	646	610	447.3
		wheat ETo	632.3	664.8	680.1	638	472.5
		rain	4.5	0	10.8	3.6	0
														`

## Sheet: mkushi statistical 
Soybean (Glycine max)		Wheat (Triticum aestivum)
								Wheat (Triticum aestivum)	Soybean (Glycine max)
Mean	9.34754e+06	Mean	1.32827e+07				Mean	1.32827e+07	9.34754e+06
Standard Error	1.15807e+06	Standard Error	1.67948e+06				Standard Error	1.67948e+06	1.15807e+06
Standard Deviation	2.58952e+06	Standard Deviation	3.75544e+06				Standard Deviation	3.75544e+06	2.58952e+06
Sample Variance	6.70563e+12	Sample Variance	1.41033e+13				Sample Variance	1.41033e+13	6.70563e+12
Kurtosis	2.64314	Kurtosis	2.33239				Kurtosis	2.33239	2.64314
Skewness	-1.37963	Skewness	-1.17935				Skewness	-1.17935	-1.37963
Range	6906850	Range	1.01667e+07				Range	1.01667e+07	6906850
Minimum	5078750	Minimum	7.21625e+06				Minimum	7.21625e+06	5078750
Maximum	11985600	Maximum	1.73829e+07				Maximum	1.73829e+07	11985600
Sum	4.67377e+07	Sum	6.64133e+07				Sum	6.64133e+07	4.67377e+07
Confidence Level(95.0%)	3.21532e+06	Confidence Level(95.0%)	4.663e+06				Confidence Level(95.0%)	4.663e+06	3.21532e+06

## Sheet: lunsemfwa  statistical 
Soybean (Glycine max)		Wheat (Triticum aestivum)
Mean	9.34754e+06	Mean	6.80792e+07							Wheat (Triticum aestivum)	Soybean (Glycine max)
Standard Error	1.15807e+06	Standard Error	5.81386e+06						Mean	6.80792e+07	9.34754e+06
Median	9664000	Median	6.48156e+07						Standard Error	5.81386e+06	1.15807e+06
Standard Deviation	2.58952e+06	Standard Deviation	1.30002e+07						Median	6.48156e+07	9664000
Sample Variance	6.70563e+12	Sample Variance	169004651382558						Standard Deviation	1.30002e+07	2.58952e+06
Kurtosis	2.64314	Kurtosis	-2.14914						Sample Variance	169004651382558	6.70563e+12
Skewness	-1.37963	Skewness	0.201795						Kurtosis	-2.14914	2.64314
Range	6906850	Range	30942700						Skewness	0.201795	-1.37963
Minimum	5078750	Minimum	52832300						Range	30942700	6906850
Maximum	11985600	Maximum	83775000						Minimum	52832300	5078750
Sum	4.67377e+07	Sum	3.40396e+08						Maximum	83775000	11985600
Confidence Level(95.0%)	3.21532e+06	Confidence Level(95.0%)	1.61419e+07						Sum	3.40396e+08	4.67377e+07
									Confidence Level(95.0%)	1.61419e+07	3.21532e+06

[truncated: 3 more sheets: Mulungushi stastical, wwomboshi statistical data, all catchment volume ]
